# Supplementary material for: Mealtime Environment and Control of Food Intake in Healthy Children and in Children with Gastrointestinal Diseases
Source: MDPI journal article supplement (doi:10.3390/children8020077), 2021-01-23
Supplement: s1 [file s1]

**Table S0.** Frequency distribution of the answers to the scale questions in the two groups.

|     |         | Initial coding (5-point) |              |              |              |              | <i>p</i>         | Condensed coding (2-point) <sup>a</sup> |              |                  |
|-----|---------|--------------------------|--------------|--------------|--------------|--------------|------------------|-----------------------------------------|--------------|------------------|
|     |         | Never                    | Rarely       | Sometimes    | Often        | Very often   |                  | Relatively                              | Relatively   | <i>p</i>         |
| Q1  | Control | 0.5%                     | 3.8%         | 8.4%         | 19.1%        | 68.2%        | 0.076            | 12.7%                                   | 87.3%        | <b>0.023</b>     |
|     | Case    | 0.7%                     | 7.8%         | 11.3%        | 22.7%        | 57.4%        |                  | 19.9%                                   | 80.1%        |                  |
| Q2  | Control | 1.1%                     | 9.9%         | 15.1%        | 25.8%        | 48.0%        | 0.803            | 26.2%                                   | 73.8%        | 0.473            |
|     | Case    | 2.1%                     | 11.3%        | 15.6%        | 27.0%        | 44.0%        |                  | 29.1%                                   | 70.9%        |                  |
| Q3  | Control | 0.8%                     | 5.3%         | 8.9%         | 30.0%        | 55.0%        | 0.477            | 15.0%                                   | 85.0%        | 0.298            |
|     | Case    | 2.1%                     | 7.1%         | 9.2%         | 31.2%        | 50.4%        |                  | 18.4%                                   | 81.6%        |                  |
| Q4  | Control | <b>4.1%</b>              | <b>9.8%</b>  | <b>33.3%</b> | <b>38.6%</b> | <b>14.2%</b> | <b>0.030</b>     | 47.1%                                   | 52.9%        | 0.052            |
|     | Case    | <b>7.1%</b>              | <b>17.0%</b> | <b>31.9%</b> | <b>29.8%</b> | <b>14.2%</b> |                  | 56.0%                                   | 44.0%        |                  |
| Q5  | Control | <b>0.4%</b>              | <b>2.9%</b>  | <b>13.7%</b> | <b>26.0%</b> | <b>56.9%</b> | <b>0.025</b>     | 17.0%                                   | 83.0%        | 0.069            |
|     | Case    | <b>1.4%</b>              | <b>7.1%</b>  | <b>14.9%</b> | <b>29.8%</b> | <b>46.8%</b> |                  | 23.4%                                   | 76.6%        |                  |
| Q6  | Control | <b>0.6%</b>              | <b>3.0%</b>  | <b>5.1%</b>  | <b>16.0%</b> | <b>75.2%</b> | <b>&lt;0.001</b> | <b>8.8%</b>                             | <b>91.2%</b> | <b>&lt;0.001</b> |
|     | Case    | <b>1.4%</b>              | <b>6.4%</b>  | <b>10.6%</b> | <b>24.8%</b> | <b>56.7%</b> |                  | <b>18.4%</b>                            | <b>81.6%</b> |                  |
| Q7  | Control | 0.3%                     | 0.6%         | 3.8%         | 22.6%        | 72.7%        | 0.776            | 4.7%                                    | 95.3%        | 0.621            |
|     | Case    | 0.7%                     | 1.4%         | 3.5%         | 22.7%        | 71.6%        |                  | 5.7%                                    | 94.3%        |                  |
| Q8  | Control | <b>0.5%</b>              | <b>1.9%</b>  | <b>11.4%</b> | <b>35.5%</b> | <b>50.7%</b> | <b>0.041</b>     | 13.9%                                   | 86.1%        | 0.567            |
|     | Case    | <b>2.8%</b>              | <b>0.7%</b>  | <b>8.5%</b>  | <b>39.0%</b> | <b>48.9%</b> |                  | 12.1%                                   | 87.9%        |                  |
| Q9  | Control | <b>0.3%</b>              | <b>3.4%</b>  | <b>10.8%</b> | <b>21.6%</b> | <b>63.9%</b> | <b>&lt;0.001</b> | <b>14.5%</b>                            | <b>85.5%</b> | <b>&lt;0.001</b> |
|     | Case    | <b>4.3%</b>              | <b>13.5%</b> | <b>20.6%</b> | <b>22.0%</b> | <b>39.7%</b> |                  | <b>38.3%</b>                            | <b>61.7%</b> |                  |
| Q10 | Control | <b>0.4%</b>              | <b>1.9%</b>  | <b>6.6%</b>  | <b>21.2%</b> | <b>69.9%</b> | <b>&lt;0.001</b> | <b>8.9%</b>                             | <b>91.1%</b> | <b>&lt;0.001</b> |
|     | Case    | <b>2.8%</b>              | <b>6.4%</b>  | <b>12.8%</b> | <b>17.7%</b> | <b>60.3%</b> |                  | <b>22.0%</b>                            | <b>78.0%</b> |                  |
| Q11 | Control | <b>13.1%</b>             | <b>21.1%</b> | <b>34.9%</b> | <b>22.9%</b> | <b>8.0%</b>  | <b>0.031</b>     | <b>69.1%</b>                            | <b>30.9%</b> | <b>0.010</b>     |
|     | Case    | <b>9.2%</b>              | <b>18.4%</b> | <b>30.5%</b> | <b>26.2%</b> | <b>15.6%</b> |                  | <b>58.2%</b>                            | <b>41.8%</b> |                  |
| Q12 | Control | <b>39.9%</b>             | <b>28.7%</b> | <b>17.2%</b> | <b>10.5%</b> | <b>3.7%</b>  | <b>0.007</b>     | <b>85.8%</b>                            | <b>14.2%</b> | <b>0.001</b>     |
|     | Case    | 36.9%                    | 22.0%        | 15.6%        | 16.3%        | 9.2%         |                  | 74.5%                                   | 25.5%        |                  |
| Q13 | Control | 2.5%                     | 10.7%        | 22.5%        | 30.1%        | 34.2%        | 0.075            | 35.7%                                   | 64.3%        | 0.668            |
|     | Case    | 6.4%                     | 10.6%        | 20.6%        | 23.4%        | 39.0%        |                  | 37.6%                                   | 62.4%        |                  |
| Q14 | Control | 16.4%                    | 32.8%        | 28.5%        | 16.6%        | 5.7%         | 0.378            | 77.6%                                   | 22.4%        | 0.521            |
|     | Case    | 13.5%                    | 32.6%        | 29.1%        | 14.9%        | 9.9%         |                  | 75.2%                                   | 24.8%        |                  |
| Q15 | Control | 8.6%                     | 21.2%        | 24.8%        | 26.4%        | 18.9%        | 0.798            | 54.6%                                   | 45.4%        | 0.760            |
|     | Case    | 11.3%                    | 19.9%        | 24.8%        | 23.4%        | 20.6%        |                  | 56.0%                                   | 44.0%        |                  |
| Q16 | Control | <b>1.8%</b>              | <b>3.3%</b>  | <b>8.8%</b>  | <b>22.5%</b> | <b>63.7%</b> | <b>0.026</b>     | <b>13.9%</b>                            | <b>86.1%</b> | <b>0.002</b>     |
|     | Case    | <b>2.8%</b>              | <b>5.7%</b>  | <b>15.6%</b> | <b>24.1%</b> | <b>51.8%</b> |                  | 24.1%                                   | 75.9%        |                  |
| Q17 | Control | 0.4%                     | 0.8%         | 1.5%         | 16.1%        | 81.2%        | 0.398            | 2.7%                                    | 97.3%        | 0.710            |
|     | Case    | 0%                       | 0%           | 2.1%         | 21.3%        | 76.6%        |                  | 2.1%                                    | 97.9%        |                  |
| Q18 | Control | 1.8%                     | 4.7%         | 17.3%        | 36.7%        | 39.4%        | 0.203            | 23.9%                                   | 76.1%        | 0.121            |
|     | Case    | 2.9%                     | 9.3%         | 17.9%        | 32.9%        | 37.1%        |                  | 30.0%                                   | 70.0%        |                  |
| Q19 | Control | 3.7%                     | 8.7%         | 24.4%        | 33.8%        | 29.4%        | 0.610            | 36.8%                                   | 63.2%        | 0.491            |
|     | Case    | 2.2%                     | 12.3%        | 25.4%        | 31.9%        | 28.3%        |                  | 39.9%                                   | 60.1%        |                  |
| Q20 | Control | 1.8%                     | 4.1%         | 9.3%         | 32.4%        | 52.4%        | 0.181            | 15.2%                                   | 84.8%        | 0.384            |
|     | Case    | 2.9%                     | 1.4%         | 13.8%        | 27.5%        | 54.3%        |                  | 18.1%                                   | 81.9%        |                  |
| Q21 | Control | 1.4%                     | 4.7%         | 18.8%        | 35.5%        | 39.7%        | 0.186            | 24.9%                                   | 75.1%        | 0.270            |
|     | Case    | 2.9%                     | 5.7%         | 20.7%        | 25.7%        | 45.0%        |                  | 29.3%                                   | 70.7%        |                  |
| Q22 | Control | <b>12.3%</b>             | <b>31.2%</b> | <b>33.7%</b> | <b>17.4%</b> | <b>5.5%</b>  | <b>0.001</b>     | 77.1%                                   | 22.9%        | 0.712            |
|     | Case    | <b>16.4%</b>             | <b>34.3%</b> | <b>25.0%</b> | <b>10.7%</b> | <b>13.6%</b> |                  | 75.7%                                   | 24.3%        |                  |
| Q23 | Control | 6.6%                     | 8.7%         | 18.2%        | 30.1%        | 36.4%        | 0.409            | 33.5%                                   | 66.5%        | 0.098            |
|     | Case    | 5.7%                     | 7.1%         | 13.6%        | 29.3%        | 44.3%        |                  | 26.4%                                   | 73.6%        |                  |
| Q24 | Control | 0.8%                     | 6.9%         | 17.6%        | 34.0%        | 40.7%        | 0.250            | 25.3%                                   | 74.7%        | 0.521            |
|     | Case    | 2.9%                     | 7.9%         | 17.1%        | 35.0%        | 37.1%        |                  | 27.9%                                   | 72.1%        |                  |

<sup>a</sup>Note: Condensed coding was applied as follows: Relatively rare: “Never”/“Rarely”/“Sometimes” & Relatively often: “Often” / “Very often or always”. *p*-value for chi-square test. *p*-values below 0.05 are shown in bold. Conclusions (in-text, Results section) are based on condensed coding.

**Table S1.** The parental practices in association with the child's sex, birth order and the existence of sib-lings. Group: healthy children.

|     |                 | Child'ssex      |                   |               |              | OnlyChild     |                |               |                  | First born    |                |               |              |
|-----|-----------------|-----------------|-------------------|---------------|--------------|---------------|----------------|---------------|------------------|---------------|----------------|---------------|--------------|
|     |                 | Male<br>N = 393 | Female<br>N = 394 | Chi<br>square | p            | No<br>N = 604 | Yes<br>N = 183 | Chi<br>square | p                | No<br>N = 376 | Yes<br>N = 411 | Chi<br>square | p            |
| Q1  | Relativelyrare  | 14.2%           | 11.2%             | 1.685         | 0.194        | 11.8%         | 15.8%          | 2.120         | 0.145            | 10.4%         | 14.8%          | 3.536         | 0.060        |
|     | Relativelyoften | 85.8%           | 88.8%             |               |              | 88.2%         | 84.2%          |               |                  | 89.6%         | 85.2%          |               |              |
| Q2  | Relativelyrare  | 27.5%           | 24.9%             | 0.692         | 0.405        | 26.2%         | 26.2%          | 0.001         | 0.985            | 24.7%         | 27.5%          | 0.774         | 0.379        |
|     | Relativelyoften | 72.5%           | 75.1%             |               |              | 73.8%         | 73.8%          |               |                  | 75.3%         | 72.5%          |               |              |
| Q3  | Relativelyrare  | 15.3%           | 14.7%             | 0.046         | 0.830        | 14.7%         | 15.8%          | 0.136         | 0.712            | 14.4%         | 15.6%          | 0.226         | 0.635        |
|     | Relativelyoften | 84.7%           | 85.3%             |               |              | 85.3%         | 84.2%          |               |                  | 85.6%         | 84.4%          |               |              |
| Q4  | Relativelyrare  | <b>52.2%</b>    | <b>42.1%</b>      | <b>7.945</b>  | <b>0.005</b> | 48.0%         | 44.3%          | 0.793         | 0.373            | 46.0%         | 48.2%          | 0.369         | 0.543        |
|     | Relativelyoften | <b>47.8%</b>    | <b>57.9%</b>      |               |              | 52.0%         | 55.7%          |               |                  | 54.0%         | 51.8%          |               |              |
| Q5  | Relativelyrare  | 18.8%           | 15.2%             | 1.806         | 0.179        | <b>15.4%</b>  | <b>22.4%</b>   | <b>4.881</b>  | <b>0.027</b>     | 14.6%         | 19.2%          | 2.933         | 0.087        |
|     | Relativelyoften | 81.2%           | 84.8%             |               |              | <b>84.6%</b>  | <b>77.6%</b>   |               |                  | 85.4%         | 80.8%          |               |              |
| Q6  | Relativelyrare  | 8.9%            | 8.6%              | 0.019         | 0.891        | <b>7.6%</b>   | <b>12.6%</b>   | <b>4.306</b>  | <b>0.038</b>     | 7.7%          | 9.7%           | 1.001         | 0.317        |
|     | Relativelyoften | 91.1%           | 91.4%             |               |              | <b>92.4%</b>  | <b>87.4%</b>   |               |                  | 92.3%         | 90.3%          |               |              |
| Q7  | Relativelyrare  | 4.1%            | 5.3%              | 0.696         | 0.404        | 4.5%          | 5.5%           | 0.310         | 0.578            | 3.7%          | 5.6%           | 1.537         | 0.215        |
|     | Relativelyoften | 95.9%           | 94.7%             |               |              | 95.5%         | 94.5%          |               |                  | 96.3%         | 94.4%          |               |              |
| Q8  | Relativelyrare  | <b>11.2%</b>    | <b>16.5%</b>      | <b>4.635</b>  | <b>0.031</b> | 13.1%         | 16.4%          | 1.293         | 0.256            | 11.4%         | 16.1%          | 3.516         | 0.061        |
|     | Relativelyoften | <b>88.8%</b>    | <b>83.5%</b>      |               |              | 86.9%         | 83.6%          |               |                  | 88.6%         | 83.9%          |               |              |
| Q9  | Relativelyrare  | <b>17.8%</b>    | <b>11.2%</b>      | <b>7.012</b>  | <b>0.008</b> | <b>11.9%</b>  | <b>23.0%</b>   | <b>13.795</b> | <b>&lt;0.001</b> | <b>10.9%</b>  | <b>17.8%</b>   | <b>7.454</b>  | <b>0.006</b> |
|     | Relativelyoften | <b>82.2%</b>    | <b>88.8%</b>      |               |              | <b>88.1%</b>  | <b>77.0%</b>   |               |                  | <b>89.1%</b>  | <b>82.2%</b>   |               |              |
| Q10 | Relativelyrare  | <b>10.9%</b>    | <b>6.9%</b>       | <b>4.059</b>  | <b>0.044</b> | <b>7.0%</b>   | <b>15.3%</b>   | <b>12.075</b> | <b>0.001</b>     | <b>5.6%</b>   | <b>11.9%</b>   | <b>9.731</b>  | <b>0.002</b> |
|     | Relativelyoften | <b>80.1%</b>    | <b>93.1%</b>      |               |              | <b>93.0%</b>  | <b>84.7%</b>   |               |                  | <b>94.4%</b>  | <b>88.1%</b>   |               |              |
| Q11 | Relativelyrare  | 66.2%           | 72.1%             | 3.235         | 0.072        | 70.0%         | 66.1%          | 1.008         | 0.315            | <b>73.7%</b>  | <b>65.0%</b>   | <b>6.974</b>  | <b>0.008</b> |
|     | Relativelyoften | 33.8%           | 27.9%             |               |              | 30.0%         | 33.9%          |               |                  | <b>26.3%</b>  | <b>35.0%</b>   |               |              |
| Q12 | Relativelyrare  | 85.0%           | 86.5%             | 0.393         | 0.531        | 86.3%         | 84.2%          | 0.510         | 0.475            | <b>89.9%</b>  | <b>82.0%</b>   | <b>10.036</b> | <b>0.002</b> |
|     | Relativelyoften | 15.0%           | 13.5%             |               |              | 13.7%         | 15.8%          |               |                  | <b>10.1%</b>  | <b>18.0%</b>   |               |              |
| Q13 | Relativelyrare  | 37.4%           | 34.0%             | 0.988         | 0.320        | 35.6%         | 36.1%          | 0.013         | 0.908            | 36.4%         | 35.0%          | 0.168         | 0.682        |
|     | Relativelyoften | 62.6%           | 66.0%             |               |              | 64.4%         | 63.9%          |               |                  | 63.6%         | 65.0%          |               |              |
| Q14 | Relativelyrare  | 80.2%           | 75.1%             | 2.862         | 0.091        | 77.3%         | 78.7%          | 0.152         | 0.697            | 79.0%         | 76.4%          | 0.759         | 0.384        |
|     | Relativelyoften | 19.8%           | 24.9%             |               |              | 22.7%         | 21.3%          |               |                  | 21.0%         | 23.6%          |               |              |
| Q15 | Relativelyrare  | 55.7%           | 53.6%             | 0.374         | 0.541        | 54.0%         | 56.8%          | 0.463         | 0.496            | 55.9%         | 53.5%          | 0.428         | 0.513        |

|     |                 |              |              |              |              |              |              |               |                  |              |              |              |              |
|-----|-----------------|--------------|--------------|--------------|--------------|--------------|--------------|---------------|------------------|--------------|--------------|--------------|--------------|
|     | Relativelyoften | 44.3%        | 46.4%        |              |              | 46.0%        | 43.2%        |               |                  | 44.1%        | 46.5%        |              |              |
| Q16 | Relativelyrare  | 14.0%        | 13.7%        | 0.014        | 0.906        | <b>11.3%</b> | <b>22.4%</b> | <b>14.624</b> | <b>&lt;0.001</b> | <b>10.6%</b> | <b>16.8%</b> | <b>6.224</b> | <b>0.013</b> |
|     | Relativelyoften | 86.0%        | 86.3%        |              |              | <b>88.7%</b> | <b>77.6%</b> |               |                  | <b>89.4%</b> | <b>83.2%</b> |              |              |
| Q17 | Relativelyrare  | <b>3.8%</b>  | <b>1.5%</b>  | <b>3.986</b> | <b>0.046</b> | 2.6%         | 2.7%         | 0.004         | 0.951            | 2.7%         | 2.7%         | 0.001        | 0.988        |
|     | Relativelyoften | <b>96.2%</b> | <b>98.5%</b> |              |              | 97.4%        | 97.3%        |               |                  | 97.3%        | 97.3%        |              |              |
| Q18 | Relativelyrare  | 22.2%        | 25.5%        | 1.187        | 0.276        | 23.1%        | 26.5%        | 0.922         | 0.337            | 21.5%        | 26.0%        | 2.122        | 0.145        |
|     | Relativelyoften | 77.8%        | 74.5%        |              |              | 76.9%        | 73.5%        |               |                  | 78.5%        | 74.0%        |              |              |
| Q19 | Relativelyrare  | 36.5%        | 37.1%        | 0.031        | 0.861        | 36.3%        | 38.3%        | 0.242         | 0.623            | 35.9%        | 37.6%        | 0.239        | 0.625        |
|     | Relativelyoften | 63.5%        | 62.9%        |              |              | 63.7%        | 61.7%        |               |                  | 64.1%        | 62.4%        |              |              |
| Q20 | Relativelyrare  | 15.3%        | 15.1%        | 0.007        | 0.933        | 15.6%        | 13.8%        | 0.351         | 0.549            | 16.0%        | 14.5%        | 0.359        | 0.549        |
|     | Relativelyoften | 84.7%        | 84.9%        |              |              | 84.4%        | 86.2%        |               |                  | 84.0%        | 85.5%        |              |              |
| Q21 | Relativelyrare  | 24.0%        | 25.8%        | 0.334        | 0.563        | 25.5%        | 22.7%        | 0.621         | 0.431            | 26.6%        | 23.3%        | 1.148        | 0.284        |
|     | Relativelyoften | 76.0%        | 74.2%        |              |              | 74.5%        | 77.3%        |               |                  | 73.4%        | 76.7%        |              |              |
| Q22 | Relativelyrare  | 75.2%        | 79.1%        | 1.680        | 0.195        | 78.4%        | 72.8%        | 2.521         | 0.112            | 79.3%        | 75.2%        | 1.837        | 0.175        |
|     | Relativelyoften | 24.8%        | 20.9%        |              |              | 21.6%        | 27.2%        |               |                  | 20.7%        | 24.8%        |              |              |
| Q23 | Relativelyrare  | <b>29.6%</b> | <b>37.5%</b> | <b>5.499</b> | <b>0.019</b> | 32.7%        | 36.5%        | 0.899         | 0.343            | 33.0%        | 34.1%        | 0.104        | 0.747        |
|     | Relativelyoften | <b>70.4%</b> | <b>62.5%</b> |              |              | 67.3%        | 63.5%        |               |                  | 67.0%        | 65.9%        |              |              |
| Q24 | Relativelyrare  | 23.0%        | 27.6%        | 2.252        | 0.133        | <b>27.1%</b> | <b>19.3%</b> | <b>4.412</b>  | <b>0.036</b>     | 27.7%        | 23.0%        | 2.279        | 0.131        |
|     | Relativelyoften | 77.0%        | 72.4%        |              |              | <b>72.9%</b> | <b>80.7%</b> |               |                  | 72.3%        | 77.0%        |              |              |

**Table S2.** The parental practices in association with the child’s age group, parent’s sex, and child-parent sex concurrence. Group: healthy children.

|     |                  | Child's age group   |                     |               |                  | Parent's sex      |                |            |       | Sex concordance |                |              |              |
|-----|------------------|---------------------|---------------------|---------------|------------------|-------------------|----------------|------------|-------|-----------------|----------------|--------------|--------------|
|     |                  | ≤5 years<br>N = 367 | >5 years<br>N = 420 | Chi square    | p                | Female<br>N = 730 | Male<br>N = 57 | Chi square | p     | No<br>N = 399   | Yes<br>N = 388 | Chi square   | p            |
| Q1  | Relatively rare  | 12.5%               | 12.9%               | 0.018         | 0.892            | 13.2%             | 7.0%           | 1.793      | 0.181 | 14.9%           | 10.5%          | 3.468        | 0.063        |
|     | Relatively often | 87.5%               | 87.1%               |               |                  | 86.8%             | 93.0%          |            |       | 85.1%           | 89.5%          |              |              |
| Q2  | Relatively rare  | 27.0%               | 25.5%               | 0.228         | 0.633            | 26.6%             | 21.1%          | 0.835      | 0.361 | 28.4%           | 24.1%          | 1.874        | 0.171        |
|     | Relatively often | 73.0%               | 74.5%               |               |                  | 73.4%             | 78.9%          |            |       | 71.6%           | 75.9%          |              |              |
| Q3  | Relatively rare  | 13.9%               | 16.0%               | 0.650         | 0.420            | 14.9%             | 15.8%          | 0.031      | 0.861 | 16.2%           | 13.8%          | 0.928        | 0.335        |
|     | Relatively often | 86.1%               | 84.0%               |               |                  | 85.1%             | 84.2%          |            |       | 83.8%           | 86.2%          |              |              |
| Q4  | Relatively rare  | 48.0%               | 46.4%               | 0.183         | 0.668            | 46.3%             | 57.9%          | 2.852      | 0.091 | <b>42.9%</b>    | <b>51.5%</b>   | <b>5.960</b> | <b>0.015</b> |
|     | Relatively often | 52.0%               | 53.6%               |               |                  | 53.7%             | 42.1%          |            |       | <b>57.1%</b>    | <b>48.5%</b>   |              |              |
| Q5  | Relatively rare  | 16.3%               | 17.6%               | 0.224         | 0.636            | 17.0%             | 17.5%          | 0.012      | 0.914 | 18.0%           | 16.0%          | 0.558        | 0.455        |
|     | Relatively often | 83.7%               | 82.4%               |               |                  | 83.0%             | 82.5%          |            |       | 82.0%           | 84.0%          |              |              |
| Q6  | Relatively rare  | 8.7%                | 8.8%                | 0.002         | 0.964            | 8.9%              | 7.0%           | 0.235      | 0.628 | 9.0%            | 8.5%           | 0.061        | 0.804        |
|     | Relatively often | 91.3%               | 91.2%               |               |                  | 91.1%             | 93.0%          |            |       | 91.0%           | 91.5%          |              |              |
| Q7  | Relatively rare  | 5.4%                | 4.0%                | 0.859         | 0.354            | 4.5%              | 7.0%           | 0.736      | 0.391 | 3.6%            | 5.8%           | 2.041        | 0.153        |
|     | Relatively often | 94.6%               | 96.0%               |               |                  | 95.5%             | 93.0%          |            |       | 96.4%           | 94.2%          |              |              |
| Q8  | Relatively rare  | 13.6%               | 14.0%               | 0.029         | 0.864            | 14.2%             | 8.8%           | 1.328      | 0.249 | 11.6%           | 16.0%          | 3.253        | 0.071        |
|     | Relatively often | 86.4%               | 86.0%               |               |                  | 85.8%             | 91.2%          |            |       | 88.4%           | 84.0%          |              |              |
| Q9  | Relatively rare  | <b>21.0%</b>        | <b>8.8%</b>         | <b>23.423</b> | <b>&lt;0.001</b> | 14.4%             | 15.8%          | 0.084      | 0.771 | 16.2%           | 12.8%          | 1.896        | 0.169        |
|     | Relatively often | <b>79.0%</b>        | <b>91.2%</b>        |               |                  | 85.6%             | 84.2%          |            |       | 83.8%           | 87.2%          |              |              |
| Q10 | Relatively rare  | 10.1%               | 7.9%                | 1.196         | 0.274            | 8.8%              | 10.5%          | 0.202      | 0.653 | 10.6%           | 7.3%           | 2.642        | 0.104        |
|     | Relatively often | 89.9%               | 92.1%               |               |                  | 91.2%             | 89.5%          |            |       | 89.4%           | 92.7%          |              |              |
| Q11 | Relatively rare  | 71.4%               | 67.1%               | 1.655         | 0.198            | 69.2%             | 68.4%          | 0.014      | 0.905 | <b>65.2%</b>    | <b>72.9%</b>   | <b>5.502</b> | <b>0.019</b> |
|     | Relatively often | 28.6%               | 32.9%               |               |                  | 30.8%             | 31.6%          |            |       | <b>34.8%</b>    | <b>27.1%</b>   |              |              |
| Q12 | Relatively rare  | 84.7%               | 86.7%               | 0.595         | 0.441            | 85.8%             | 86.0%          | 0.002      | 0.965 | 85.3%           | 86.2%          | 0.132        | 0.716        |
|     | Relatively often | 15.3%               | 13.3%               |               |                  | 14.2%             | 14.0%          |            |       | 14.7%           | 13.8%          |              |              |
| Q13 | Relatively rare  | <b>31.6%</b>        | <b>39.3%</b>        | <b>5.030</b>  | <b>0.025</b>     | 36.0%             | 31.6%          | 0.456      | 0.500 | 36.9%           | 34.6%          | 0.441        | 0.507        |
|     | Relatively often | <b>68.4%</b>        | <b>60.7%</b>        |               |                  | 64.0%             | 68.4%          |            |       | 63.1%           | 65.4%          |              |              |
| Q14 | Relatively rare  | 78.5%               | 76.9%               | 0.278         | 0.598            | 77.5%             | 78.9%          | 0.061      | 0.805 | 78.9%           | 76.4%          | 0.666        | 0.414        |
|     | Relatively often | 21.5%               | 23.1%               |               |                  | 22.5%             | 21.1%          |            |       | 21.1%           | 23.6%          |              |              |
| Q15 | Relatively rare  | 52.3%               | 56.7%               | 1.496         | 0.221            | 54.8%             | 52.6%          | 0.100      | 0.752 | 55.4%           | 53.9%          | 0.185        | 0.667        |

|     |                 |              |              |              |              |              |              |              |              |              |              |              |              |
|-----|-----------------|--------------|--------------|--------------|--------------|--------------|--------------|--------------|--------------|--------------|--------------|--------------|--------------|
|     | Relativelyoften | 47.7%        | 43.3%        |              |              | 45.2%        | 47.4%        |              |              | 44.6%        | 46.1%        |              |              |
| Q16 | Relativelyrare  | 14.4%        | 13.3%        | 0.202        | 0.653        | <b>13.2%</b> | <b>22.8%</b> | <b>4.132</b> | <b>0.042</b> | 13.9%        | 13.8%        | 0.003        | 0.957        |
|     | Relativelyoften | 85.6%        | 86.7%        |              |              | <b>86.8%</b> | <b>77.2%</b> |              |              | 86.1%        | 86.2%        |              |              |
| Q17 | Relativelyrare  | 2.5%         | 2.9%         | 0.124        | 0.725        | 2.5%         | 5.3%         | 1.593        | 0.207        | <b>4.1%</b>  | <b>1.3%</b>  | <b>6.241</b> | <b>0.012</b> |
|     | Relativelyoften | 97.5%        | 97.1%        |              |              | 97.5%        | 94.7%        |              |              | <b>95.9%</b> | <b>98.7%</b> |              |              |
| Q18 | Relativelyrare  | 24.7%        | 23.2%        | 0.244        | 0.621        | <b>22.8%</b> | <b>36.2%</b> | <b>5.711</b> | <b>0.017</b> | 22.2%        | 25.4%        | 1.118        | 0.290        |
|     | Relativelyoften | 75.3%        | 76.8%        |              |              | <b>77.2%</b> | <b>63.2%</b> |              |              | 77.8%        | 74.6%        |              |              |
| Q19 | Relativelyrare  | 34.9%        | 38.4%        | 1.047        | 0.306        | 37.1%        | 33.3%        | 0.314        | 0.575        | 35.7%        | 37.9%        | 0.415        | 0.520        |
|     | Relativelyoften | 65.1%        | 61.6%        |              |              | 62.9%        | 66.7%        |              |              | 64.3%        | 62.1%        |              |              |
| Q20 | Relativelyrare  | 14.3%        | 16.0%        | 0.439        | 0.508        | 14.7%        | 21.1%        | 1.635        | 0.201        | 15.0%        | 15.4%        | 0.026        | 0.871        |
|     | Relativelyoften | 85.7%        | 84.0%        |              |              | 85.3%        | 78.9%        |              |              | 85.0%        | 84.6%        |              |              |
| Q21 | Relativelyrare  | <b>21.4%</b> | <b>27.9%</b> | <b>4.484</b> | <b>0.034</b> | 24.2%        | 33.3%        | 2.355        | 0.125        | 24.5%        | 25.2%        | 0.043        | 0.836        |
|     | Relativelyoften | <b>78.6%</b> | <b>72.1%</b> |              |              | 75.8%        | 66.7%        |              |              | 75.5%        | 74.8%        |              |              |
| Q22 | Relativelyrare  | 74.7%        | 79.2%        | 2.248        | 0.134        | 77.0%        | 78.9%        | 0.114        | 0.736        | 76.9%        | 77.3%        | 0.017        | 0.897        |
|     | Relativelyoften | 25.3%        | 20.8%        |              |              | 23.0%        | 21.1%        |              |              | 23.1%        | 22.7%        |              |              |
| Q23 | Relativelyrare  | 34.8%        | 32.5%        | 0.478        | 0.490        | 32.9%        | 42.1%        | 2.020        | 0.155        | <b>29.5%</b> | <b>37.5%</b> | <b>5.731</b> | <b>0.017</b> |
|     | Relativelyoften | 65.2%        | 67.5%        |              |              | 67.1%        | 57.9%        |              |              | <b>70.5%</b> | <b>62.5%</b> |              |              |
| Q24 | Relativelyrare  | 24.5%        | 26.0%        | 0.252        | 0.616        | 24.5%        | 35.1%        | 3.125        | 0.077        | 26.4%        | 24.2%        | 0.521        | 0.470        |
|     | Relativelyoften | 75.5%        | 74.0%        |              |              | 75.5%        | 64.9%        |              |              | 73.6%        | 75.8%        |              |              |

**Table S3.** The parental practices in association with the parent’s age, education and employment status. Group: healthy children.

|     |                 | Parent's age group |           |            |       | Parent's education |           |            |        | Working Parent |         |            |       |
|-----|-----------------|--------------------|-----------|------------|-------|--------------------|-----------|------------|--------|----------------|---------|------------|-------|
|     |                 | <40 years          | ≥40 years | Chi square | p     | ≤12 years          | >12 years | Chi square | p      | No             | Yes     | Chi square | p     |
|     |                 | N = 581            | N = 206   |            |       | N = 362            | N = 425   |            |        | N = 235        | N = 552 |            |       |
| Q1  | Relativelyrare  | 12.7%              | 12.6%     | 0.002      | 0.966 | 9.8%               | 15.1%     | 4.609      | 0.032  | 11.9%          | 13.0%   | 0.189      | 0.664 |
|     | Relativelyoften | 87.3%              | 87.4%     |            |       | 90.1%              | 84.9%     |            |        | 88.1%          | 87.0%   |            |       |
| Q2  | Relativelyrare  | 25.8%              | 27.2%     | 0.147      | 0.701 | 21.3%              | 30.4%     | 8.345      | 0.004  | 23.0%          | 27.5%   | 1.772      | 0.183 |
|     | Relativelyoften | 74.2%              | 72.8%     |            |       | 78.7%              | 69.6%     |            |        | 77.0%          | 72.5%   |            |       |
| Q3  | Relativelyrare  | 15.5%              | 84.5%     | 0.430      | 0.512 | 15.2%              | 14.8%     | 0.021      | 0.885  | 11.5%          | 16.5%   | 3.228      | 0.072 |
|     | Relativelyoften | 13.6%              | 86.4%     |            |       | 84.8%              | 85.2%     |            |        | 88.5%          | 83.5%   |            |       |
| Q4  | Relativelyrare  | 47.8%              | 45.1%     | 0.446      | 0.504 | 44.2%              | 49.6%     | 2.329      | 0.127  | 54.9%          | 43.8%   | 8.081      | 0.004 |
|     | Relativelyoften | 52.2%              | 54.9%     |            |       | 55.8%              | 50.4%     |            |        | 45.1%          | 56.2%   |            |       |
| Q5  | Relativelyrare  | 15.5%              | 21.4%     | 3.708      | 0.054 | 12.7%              | 20.7%     | 8.853      | 0.003  | 13.2%          | 18.7%   | 3.488      | 0.062 |
|     | Relativelyoften | 84.5%              | 78.6%     |            |       | 87.3%              | 79.3%     |            |        | 86.8%          | 81.3%   |            |       |
| Q6  | Relativelyrare  | 8.6%               | 9.2%      | 0.072      | 0.788 | 9.7%               | 8.0%      | 0.680      | 0.409  | 9.4%           | 8.5%    | 0.148      | 0.701 |
|     | Relativelyoften | 91.4%              | 90.8%     |            |       | 90.3%              | 92.0%     |            |        | 90.6%          | 91.5%   |            |       |
| Q7  | Relativelyrare  | 4.5%               | 5.3%      | 0.254      | 0.614 | 6.6%               | 3.1%      | 5.564      | 0.027  | 5.1%           | 4.5%    | 0.123      | 0.726 |
|     | Relativelyoften | 95.5%              | 94.7%     |            |       | 93.4%              | 96.9%     |            |        | 94.9%          | 95.5%   |            |       |
| Q8  | Relativelyrare  | 15.0%              | 10.7%     | 2.351      | 0.125 | 18.8%              | 9.6%      | 13.769     | <0.001 | 17.4%          | 12.3%   | 3.633      | 0.057 |
|     | Relativelyoften | 85.0%              | 89.3%     |            |       | 81.2%              | 90.4%     |            |        | 82.6%          | 87.7%   |            |       |
| Q9  | Relativelyrare  | 14.6%              | 14.1%     | 0.037      | 0.847 | 13.3%              | 15.5%     | 0.813      | 0.367  | 13.9%          | 15.7%   | 0.429      | 0.513 |
|     | Relativelyoften | 85.4%              | 85.9%     |            |       | 86.7%              | 84.5%     |            |        | 86.1%          | 84.3%   |            |       |
| Q10 | Relativelyrare  | 8.6%               | 9.7%      | 0.228      | 0.633 | 7.5%               | 10.1%     | 1.706      | .192   | 10.2%          | 8.3%    | 0.718      | 0.397 |
|     | Relativelyoften | 91.4%              | 90.3%     |            |       | 92.5%              | 89.5%     |            |        | 89.8%          | 91.7%   |            |       |
| Q11 | Relativelyrare  | 70.4%              | 65.5%     | 1.684      | 0.194 | 66.9%              | 71.1%     | 1.622      | .203   | 69.9%          | 67.2%   | 0.560      | 0.454 |
|     | Relativelyoften | 29.6%              | 34.5%     |            |       | 33.1%              | 28.9%     |            |        | 30.1%          | 32.8%   |            |       |
| Q12 | Relativelyrare  | 85.0%              | 87.9%     | 1.004      | 0.316 | 83.4%              | 87.8%     | 3.016      | 0.082  | 82.6%          | 87.1%   | 2.838      | 0.092 |
|     | Relativelyoften | 15.0%              | 12.1%     |            |       | 16.2%              | 12.2%     |            |        | 17.4%          | 12.9%   |            |       |
| Q13 | Relativelyrare  | 35.8%              | 35.4%     | 0.009      | 0.925 | 38.4%              | 33.4%     | 2.117      | 0.146  | 38.7%          | 34.4%   | 1.330      | 0.249 |
|     | Relativelyoften | 64.2%              | 64.6%     |            |       | 61.6%              | 66.6%     |            |        | 61.3%          | 65.6%   |            |       |
| Q14 | Relativelyrare  | 78.0%              | 76.7%     | 0.141      | 0.707 | 77.1%              | 78.1%     | 0.123      | 0.726  | 78.7%          | 77.2%   | 0.228      | 0.633 |
|     | Relativelyoften | 22.0%              | 23.3%     |            |       | 22.9%              | 21.9%     |            |        | 21.3%          | 22.8%   |            |       |
| Q15 | Relativelyrare  | 55.4%              | 52.4%     | 0.550      | 0.458 | 55.5%              | 53.9%     | 0.213      | 0.645  | 54.0%          | 54.9%   | 0.048      | 0.827 |

|     |                 |       |       |       |       |              |              |              |              |              |              |              |              |
|-----|-----------------|-------|-------|-------|-------|--------------|--------------|--------------|--------------|--------------|--------------|--------------|--------------|
|     | Relativelyoften | 44.6% | 47.6% |       |       | 44.5%        | 46.1%        |              |              | 46.0%        | 45.1%        |              |              |
| Q16 | Relativelyrare  | 14.3% | 12.6% | 0.353 | 0.552 | 14.1%        | 13.6%        | 0.032        | 0.858        | 12.8%        | 14.3%        | 0.330        | 0.566        |
|     | Relativelyoften | 85.7% | 87.4% |       |       | 85.9%        | 86.4%        |              |              | 87.2%        | 85.7%        |              |              |
| Q17 | Relativelyrare  | 3.1%  | 1.5%  | 1.578 | 0.209 | 3.0%         | 2.4%         | 0.354        | 0.552        | <b>0.9%</b>  | <b>3.4%</b>  | <b>4.260</b> | <b>0.039</b> |
|     | Relativelyoften | 96.9% | 98.5% |       |       | 97.0%        | 97.6%        |              |              | <b>99.1%</b> | <b>96.6%</b> |              |              |
| Q18 | Relativelyrare  | 24.2% | 22.9% | 0.131 | 0.718 | 25.1%        | 22.7%        | 0.612        | 0.434        | 19.7%        | 25.6%        | 3.230        | 0.072        |
|     | Relativelyoften | 75.8% | 77.1% |       |       | 74.9%        | 77.3%        |              |              | 80.3%        | 74.4%        |              |              |
| Q19 | Relativelyrare  | 37.5% | 34.6% | 0.551 | 0.458 | 34.3%        | 38.9%        | 1.705        | 0.192        | 35.9%        | 37.2%        | 0.112        | 0.738        |
|     | Relativelyoften | 62.5% | 65.4% |       |       | 65.7%        | 61.1%        |              |              | 64.1%        | 62.8%        |              |              |
| Q20 | Relativelyrare  | 14.4% | 17.6% | 1.203 | 0.273 | 16.9%        | 13.7%        | 1.501        | 0.220        | 15.0%        | 15.3%        | 0.015        | 0.903        |
|     | Relativelyoften | 85.6% | 82.4% |       |       | 83.1%        | 86.3%        |              |              | 85.0%        | 84.7%        |              |              |
| Q21 | Relativelyrare  | 25.2% | 23.9% | 0.140 | 0.709 | 26.0%        | 23.9%        | 0.431        | 0.511        | 22.6%        | 25.8%        | 0.882        | 0.348        |
|     | Relativelyoften | 74.8% | 76.1% |       |       | 74.0%        | 76.1%        |              |              | 77.4%        | 74.2%        |              |              |
| Q22 | Relativelyrare  | 77.0% | 77.6% | 0.028 | 0.867 | 79.2%        | 75.4%        | 1.651        | 0.199        | 80.3%        | 75.8%        | 1.941        | 0.164        |
|     | Relativelyoften | 23.0% | 22.4% |       |       | 20.8%        | 24.6%        |              |              | 19.7%        | 24.2%        |              |              |
| Q23 | Relativelyrare  | 33.0% | 35.1% | 0.309 | 0.578 | 32.6%        | 34.4%        | 0.272        | 0.602        | 28.6%        | 35.6%        | 3.612        | 0.057        |
|     | Relativelyoften | 67.0% | 64.9% |       |       | 67.4%        | 65.6%        |              |              | 71.4%        | 64.4%        |              |              |
| Q24 | Relativelyrare  | 25.6% | 24.4% | 0.118 | 0.731 | <b>21.8%</b> | <b>28.3%</b> | <b>4.276</b> | <b>0.039</b> | 26.9%        | 24.6%        | 0.473        | 0.492        |
|     | Relativelyoften | 74.4% | 75.6% |       |       | <b>78.2%</b> | <b>71.7%</b> |              |              | 73.1%        | 75.4%        |              |              |

**Table S4.** The parental practices in association with the child's sex, birth order and the existence of sib-lings. Group: Children with gastrointestinal diseases.

|     |                 | Child'ssex     |                  |               |              | OnlyChild    |               |               |              | First born   |               |               |       |
|-----|-----------------|----------------|------------------|---------------|--------------|--------------|---------------|---------------|--------------|--------------|---------------|---------------|-------|
|     |                 | Male<br>N = 77 | Female<br>N = 64 | Chi<br>square | p            | No<br>N = 95 | Yes<br>N = 46 | Chi<br>square | p            | No<br>N = 50 | Yes<br>N = 91 | Chi<br>square | p     |
| Q1  | Relativelyrare  | 14.3%          | 26.6%            | 3.310         | 0.069        | 18.9%        | 21.7%         | 0.152         | 0.697        | 18.0%        | 20.9%         | 0.168         | 0.682 |
|     | Relativelyoften | 85.7%          | 73.4%            |               |              | 81.1%        | 78.3%         |               |              | 82.0%        | 79.1%         |               |       |
| Q2  | Relativelyrare  | 34.4%          | 24.7%            | 1.594         | 0.207        | 30.5%        | 26.1%         | 0.296         | 0.586        | 30.0%        | 28.6%         | 0.032         | 0.858 |
|     | Relativelyoften | 65.6%          | 75.3%            |               |              | 69.5%        | 73.9%         |               |              | 70.0%        | 71.4%         |               |       |
| Q3  | Relativelyrare  | 21.9%          | 15.6%            | 0.920         | 0.338        | 17.9%        | 19.6%         | 0.058         | 0.810        | 18.0%        | 18.7%         | 0.010         | 0.921 |
|     | Relativelyoften | 78.1%          | 84.4%            |               |              | 82.1%        | 80.4%         |               |              | 82.0%        | 81.3%         |               |       |
| Q4  | Relativelyrare  | <b>64.9%</b>   | <b>45.3%</b>     | <b>5.462</b>  | <b>0.019</b> | 53.7%        | 60.9%         | 0.649         | 0.420        | 56.0%        | 56.0%         | 0.001         | 0.996 |
|     | Relativelyoften | <b>35.1%</b>   | <b>54.7%</b>     |               |              | 46.3%        | 39.1%         |               |              | 44.0%        | 44.0%         |               |       |
| Q5  | Relativelyrare  | 27.3%          | 18.8%            | 1.416         | 0.234        | 18.9%        | 32.6%         | 3.227         | 0.072        | 20.0%        | 25.3%         | 0.501         | 0.479 |
|     | Relativelyoften | 72.7%          | 81.3%            |               |              | 81.1%        | 67.4%         |               |              | 80.0%        | 74.7%         |               |       |
| Q6  | Relativelyrare  | 20.8%          | 15.6%            | 0.617         | 0.432        | 17.9%        | 19.6%         | 0.058         | 0.810        | 20.0%        | 17.6%         | 0.125         | 0.723 |
|     | Relativelyoften | 79.2%          | 84.4%            |               |              | 82.1%        | 80.4%         |               |              | 80.0%        | 82.4%         |               |       |
| Q7  | Relativelyrare  | 5.2%           | 6.3%             | 0.073         | 0.787        | 6.3%         | 4.3%          | 0.224         | 0.636        | 6.0%         | 5.5%          | 0.015         | 0.901 |
|     | Relativelyoften | 94.8%          | 93.8%            |               |              | 93.7%        | 95.7%         |               |              | 94.0%        | 94.5%         |               |       |
| Q8  | Relativelyrare  | 14.3%          | 9.4%             | 0.795         | 0.373        | 12.6%        | 10.9%         | 0.091         | 0.763        | 14.0%        | 11.0%         | 0.276         | 0.599 |
|     | Relativelyoften | 85.7%          | 90.6%            |               |              | 87.4%        | 89.1%         |               |              | 86.0%        | 89.0%         |               |       |
| Q9  | Relativelyrare  | 39.0%          | 37.5%            | 0.032         | 0.859        | 37.9%        | 39.1          | 0.020         | 0.887        | 46.0%        | 34.1%         | 1.945         | 0.163 |
|     | Relativelyoften | 61.0%          | 62.5%            |               |              | 62.1%        | 60.9%         |               |              | 54.0%        | 65.9%         |               |       |
| Q10 | Relativelyrare  | 24.7%          | 18.8%            | 0.715         | 0.398        | 17.9%        | 30.4%         | 2.841         | 0.092        | 22.0%        | 22.0%         | 0.001         | 0.998 |
|     | Relativelyoften | 75.3%          | 81.3%            |               |              | 82.1%        | 69.6%         |               |              | 78.0%        | 78.0%         |               |       |
| Q11 | Relativelyrare  | 57.1%          | 59.4%            | 0.072         | 0.789        | 56.8%        | 60.9%         | 0.207         | 0.649        | 60.0%        | 57.1%         | 0.108         | 0.742 |
|     | Relativelyoften | 42.9%          | 40.6%            |               |              | 43.2%        | 39.1%         |               |              | 40.0%        | 42.9%         |               |       |
| Q12 | Relativelyrare  | <b>64.9%</b>   | <b>85.9%</b>     | <b>8.108</b>  | <b>0.004</b> | 78.9%        | 62.5%         | 3.073         | 0.080        | 80.0%        | 71.4%         | 1.247         | 0.264 |
|     | Relativelyoften | <b>35.1%</b>   | <b>14.1%</b>     |               |              | 21.1%        | 34.8%         |               |              | 20.0%        | 28.6%         |               |       |
| Q13 | Relativelyrare  | 41.6%          | 32.8%            | 1.140         | 0.286        | <b>45.3%</b> | <b>21.7%</b>  | <b>7.311</b>  | <b>0.007</b> | 46.0%        | 33.0%         | 2.336         | 0.126 |
|     | Relativelyoften | 58.4%          | 67.2%            |               |              | <b>54.7%</b> | <b>78.3%</b>  |               |              | 54.0%        | 67.0%         |               |       |
| Q14 | Relativelyrare  | 68.8%          | 82.8%            | 3.661         | 0.056        | 76.8%        | 71.7%         | 0.432         | 0.511        | 78.0%        | 73.6%         | 0.331         | 0.565 |
|     | Relativelyoften | 31.2%          | 17.2%            |               |              | 23.2%        | 28.3%         |               |              | 22.0%        | 26.4%         |               |       |
| Q15 | Relativelyrare  | 54.5%          | 57.8%            | 0.151         | 0.697        | 57.9%        | 52.2%         | 0.412         | 0.521        | 64.0%        | 51.6%         | 1.998         | 0.157 |



|     |                 |       |       |       |       |              |              |              |              |       |       |       |       |
|-----|-----------------|-------|-------|-------|-------|--------------|--------------|--------------|--------------|-------|-------|-------|-------|
|     | Relativelyoften | 45.5% | 42.2% |       |       | 42.1%        | 47.8%        |              |              | 36.0% | 48.4% |       |       |
| Q16 | Relativelyrare  | 23.4% | 25.0% | 0.050 | 0.822 | 24.2%        | 23.9%        | 0.001        | 0.969        | 24.0% | 24.2% | 0.001 | 0.981 |
|     | Relativelyoften | 76.6% | 75.0% |       |       | 75.8%        | 76.1%        |              |              | 76.0% | 75.8% |       |       |
| Q17 | Relativelyrare  | 1.3%  | 3.1%  | 0.560 | 0.454 | 3.2%         | 0.0%         | 1.484        | 0.223        | 2.0%  | 2.2%  | 0.006 | 0.938 |
|     | Relativelyoften | 98.7% | 96.9% |       |       | 96.8%        | 100.0%       |              |              | 98.0% | 97.8% |       |       |
| Q18 | Relativelyrare  | 32.5% | 27.0% | 0.496 | 0.481 | 32.6%        | 24.4%        | 0.975        | 0.324        | 28.0% | 31.1% | 0.148 | 0.700 |
|     | Relativelyoften | 67.5% | 73.0% |       |       | 67.4%        | 75.6%        |              |              | 72.0% | 68.9% |       |       |
| Q19 | Relativelyrare  | 39.5% | 40.3% | 0.010 | 0.919 | 38.7%        | 42.2%        | 0.156        | 0.693        | 40.8% | 39.3% | 0.029 | 0.864 |
|     | Relativelyoften | 60.5% | 59.7% |       |       | 61.3%        | 57.8%        |              |              | 59.2% | 60.7% |       |       |
| Q20 | Relativelyrare  | 21.1% | 14.5% | 0.983 | 0.321 | 15.1%        | 24.4%        | 1.803        | 0.179        | 18.4% | 18.0% | 0.003 | 0.955 |
|     | Relativelyoften | 78.9% | 85.5% |       |       | 84.9%        | 75.6%        |              |              | 81.6% | 82.0% |       |       |
| Q21 | Relativelyrare  | 31.6% | 26.6% | 0.422 | 0.516 | 27.7%        | 32.6%        | 0.365        | 0.546        | 32.7% | 27.5% | 0.413 | 0.521 |
|     | Relativelyoften | 68.4% | 73.4% |       |       | 72.3%        | 67.4%        |              |              | 67.3% | 72.5% |       |       |
| Q22 | Relativelyrare  | 73.7% | 78.1% | 0.373 | 0.542 | <b>81.9%</b> | <b>63.0%</b> | <b>5.982</b> | <b>0.014</b> | 77.6% | 74.7% | 0.138 | 0.710 |
|     | Relativelyoften | 26.3% | 21.9% |       |       | <b>18.1%</b> | <b>37.0%</b> |              |              | 22.4% | 25.3% |       |       |
| Q23 | Relativelyrare  | 27.6% | 25.0% | 0.124 | 0.725 | 24.5%        | 30.4%        | 0.566        | 0.452        | 24.5% | 27.5% | 0.146 | 0.703 |
|     | Relativelyoften | 72.4% | 75.0% |       |       | 75.5%        | 69.6%        |              |              | 75.5% | 72.5% |       |       |
| Q24 | Relativelyrare  | 26.3% | 29.7% | 0.197 | 0.658 | 31.9%        | 19.6%        | 2.344        | 0.126        | 36.7% | 23.1% | 2.956 | 0.086 |
|     | Relativelyoften | 73.7% | 70.3% |       |       | 68.1%        | 80.4%        |              |              | 63.3% | 76.9% |       |       |

**Table S5.** The parental practices in association with the child’s age group, parent’s sex, and child-parent sex concurrence. Group: Children with gastrointestinal diseases.

|     |                  | Child's age group |              | Chi square    | p                | Parent's sex |        | Chi square | p     | Sex concordance |              | Chi square   | p            |
|-----|------------------|-------------------|--------------|---------------|------------------|--------------|--------|------------|-------|-----------------|--------------|--------------|--------------|
|     |                  | ≤5 years          | >5 years     |               |                  | Female       | Male   |            |       | No              | Yes          |              |              |
|     |                  | N = 99            | N = 42       |               |                  | N = 136      | N = 5  |            |       | N = 80          | N = 61       |              |              |
| Q1  | Relatively rare  | 21.2%             | 16.7%        | 0.383         | 0.536            | 19.9%        | 20.0%  | 0.001      | 0.994 | 15.0%           | 26.2%        | 2.742        | 0.098        |
|     | Relatively often | 78.8%             | 83.3%        |               |                  | 80.1%        | 80.0%  |            |       | 85.0%           | 73.8%        |              |              |
| Q2  | Relatively rare  | 33.3%             | 19.0%        | 2.918         | 0.088            | 29.4%        | 20.0%  | 0.207      | 0.649 | 25.0%           | 34.4%        | 1.491        | 0.222        |
|     | Relatively often | 66.7%             | 81.0%        |               |                  | 70.6%        | 80.0%  |            |       | 75.0%           | 65.6%        |              |              |
| Q3  | Relatively rare  | 20.2%             | 14.3%        | 0.686         | 0.407            | 18.4%        | 20.0%  | 0.008      | 0.927 | 16.3%           | 21.3%        | 0.590        | 0.443        |
|     | Relatively often | 79.8%             | 85.7%        |               |                  | 81.6%        | 80.0%  |            |       | 83.8%           | 78.7%        |              |              |
| Q4  | Relatively rare  | 59.6%             | 47.6%        | 1.717         | 0.190            | 55.1%        | 80.0%  | 1.209      | 0.272 | <b>67.5%</b>    | <b>41.0%</b> | <b>9.878</b> | <b>0.002</b> |
|     | Relatively often | 40.4%             | 52.4%        |               |                  | 44.9%        | 20.0%  |            |       | <b>32.5%</b>    | <b>59.0%</b> |              |              |
| Q5  | Relatively rare  | <b>29.3%</b>      | <b>9.5%</b>  | <b>6.429</b>  | <b>0.011</b>     | 23.5%        | 20.0%  | 0.034      | 0.855 | 27.5%           | 18.0%        | 1.730        | 0.188        |
|     | Relatively often | <b>70.7%</b>      | <b>90.5%</b> |               |                  | 76.5%        | 80.0%  |            |       | 72.5%           | 82.0%        |              |              |
| Q6  | Relatively rare  | <b>24.2%</b>      | <b>4.8%</b>  | <b>7.441</b>  | <b>0.006</b>     | 18.4%        | 20.0%  | 0.008      | 0.927 | 21.3%           | 14.8%        | 0.971        | 0.324        |
|     | Relatively often | <b>75.8%</b>      | <b>95.2%</b> |               |                  | 81.6%        | 80.0%  |            |       | 78.8%           | 85.2%        |              |              |
| Q7  | Relatively rare  | 5.1%              | 7.1%         | 0.241         | 0.623            | 5.9%         | 0.0%   | 0.312      | 0.577 | 5.0%            | 6.6%         | 0.157        | 0.692        |
|     | Relatively often | 94.9%             | 92.9%        |               |                  | 94.1%        | 100.0% |            |       | 95.0%           | 93.4%        |              |              |
| Q8  | Relatively rare  | 12.1%             | 11.9%        | 0.001         | 0.971            | 11.8%        | 20.0%  | 0.308      | 0.579 | 15.0%           | 8.2%         | 1.511        | 0.219        |
|     | Relatively often | 87.9%             | 88.1%        |               |                  | 88.2%        | 80.0%  |            |       | 85.0%           | 91.8%        |              |              |
| Q9  | Relatively rare  | <b>49.5%</b>      | <b>11.9%</b> | <b>17.634</b> | <b>&lt;0.001</b> | 38.2%        | 40.0%  | 0.006      | 0.936 | 40.0%           | 36.1%        | 0.227        | 0.634        |
|     | Relatively often | <b>50.5%</b>      | <b>88.1%</b> |               |                  | 61.8%        | 60.0%  |            |       | 60.0%           | 63.9%        |              |              |
| Q10 | Relatively rare  | 28.3%             | 7.1%         | 7.683         | <b>0.006</b>     | 21.3%        | 40.0%  | 0.981      | 0.322 | 23.8%           | 19.7%        | 0.336        | 0.562        |

|     |                 |       |       |       |       |              |               |              |              |              |              |              |              |
|-----|-----------------|-------|-------|-------|-------|--------------|---------------|--------------|--------------|--------------|--------------|--------------|--------------|
|     | Relativelyoften | 71.7% | 92.9% |       |       | 78.7%        | 60.0%         |              |              | 76.3%        | 80.3%        |              |              |
| Q11 | Relativelyrare  | 59.6% | 54.8% | 0.283 | 0.595 | 57.4%        | 80.0%         | 1.016        | 0.313        | 57.5%        | 59.0%        | 0.033        | 0.856        |
|     | Relativelyoften | 40.4% | 45.2% |       |       | 42.6%        | 20.0%         |              |              | 42.5%        | 41.0%        |              |              |
| Q12 | Relativelyrare  | 71.7% | 81.0% | 1.323 | 0.250 | 74.3%        | 80.0%         | 0.083        | 0.773        | <b>65.0%</b> | <b>86.9%</b> | <b>8.719</b> | <b>0.003</b> |
|     | Relativelyoften | 28.3% | 19.0% |       |       | 25.7%        | 20.0%         |              |              | <b>35.0%</b> | <b>13.1%</b> |              |              |
| Q13 | Relativelyrare  | 34.3% | 45.2% | 1.492 | 0.222 | 36.8%        | 60.0%         | 1.110        | 0.292        | 41.3%        | 32.8%        | 1.057        | 0.304        |
|     | Relativelyoften | 65.7% | 54.8% |       |       | 63.2%        | 40.0%         |              |              | 58.8%        | 67.2%        |              |              |
| Q14 | Relativelyrare  | 73.7% | 78.6% | 0.369 | 0.543 | 74.3%        | 100.0%        | 1.712        | 0.191        | 70.0%        | 82.0%        | 2.656        | 0.103        |
|     | Relativelyoften | 26.3% | 21.4% |       |       | 25.7%        | 0.0%          |              |              | 30.0%        | 18.0%        |              |              |
| Q15 | Relativelyrare  | 52.5% | 64.3% | 1.656 | 0.198 | <b>54.4%</b> | <b>100.0%</b> | <b>4.068</b> | <b>0.044</b> | 56.3%        | 55.7%        | 0.004        | 0.952        |
|     | Relativelyoften | 47.5% | 35.7% |       |       | <b>45.6%</b> | <b>0.0%</b>   |              |              | 43.8%        | 44.3%        |              |              |
| Q16 | Relativelyrare  | 23.2% | 26.2% | 0.141 | 0.707 | 24.3%        | 20.0%         | 0.048        | 0.827        | 21.3%        | 27.9%        | 0.829        | 0.363        |
|     | Relativelyoften | 76.8% | 73.8% |       |       | 75.7%        | 80.0%         |              |              | 78.8%        | 72.1%        |              |              |
| Q17 | Relativelyrare  | 2.0%  | 2.4%  | 0.018 | 0.892 | 2.2%         | 0.0%          | 0.113        | 0.737        | 1.3%         | 3.5%         | 0.684        | 0.408        |
|     | Relativelyoften | 98.0% | 97.6% |       |       | 97.8%        | 100.0%        |              |              | 98.8%        | 96.7%        |              |              |
| Q18 | Relativelyrare  | 33.7% | 21.4% | 2.099 | 0.147 | 30.4%        | 20.0%         | 0.247        | 0.619        | 32.5%        | 26.7%        | 0.556        | 0.456        |
|     | Relativelyoften | 66.3% | 78.6% |       |       | 69.6%        | 80.0%         |              |              | 67.5%        | 73.3%        |              |              |
| Q19 | Relativelyrare  | 38.1% | 43.9% | 0.399 | 0.528 | 40.6%        | 20.0%         | 0.853        | 0.356        | 39.2%        | 40.7%        | 0.029        | 0.865        |
|     | Relativelyoften | 61.9% | 56.1% |       |       | 59.4%        | 80.0%         |              |              | 60.8%        | 59.3%        |              |              |
| Q20 | Relativelyrare  | 16.5% | 22.0% | 0.578 | 0.447 | 18.8%        | 0.0%          | 1.148        | 0.284        | 20.3%        | 15.3%        | 0.569        | 0.451        |
|     | Relativelyoften | 83.5% | 78.0% |       |       | 81.2%        | 100.0%        |              |              | 79.7%        | 84.7%        |              |              |
| Q21 | Relativelyrare  | 30.6% | 26.2% | 0.278 | 0.598 | 30.4%        | 0.0%          | 2.147        | 0.143        | 30.4%        | 27.9%        | 0.105        | 0.746        |

|     |                 |       |       |       |       |       |        |       |       |       |        |       |       |
|-----|-----------------|-------|-------|-------|-------|-------|--------|-------|-------|-------|--------|-------|-------|
|     | Relativelyoften | 69.4% | 73.8% |       |       | 69.6% | 100.0% |       |       | 69.6% | 72.1%  |       |       |
| Q22 | Relativelyrare  | 73.5% | 81.0% | 0.895 | 0.344 | 76.3% | 60.0%  | 0.696 | 0.404 | 72.2% | 80.3%  | 1.251 | 0.263 |
|     | Relativelyoften | 26.5% | 19.0% |       |       | 23.7% | 40.0%  |       |       | 27.8% | 191.7% |       |       |
| Q23 | Relativelyrare  | 26.5% | 26.2% | 0.002 | 0.967 | 27.4% | 0.0%   | 1.863 | 0.172 | 26.6% | 26.2%  | 0.002 | 0.963 |
|     | Relativelyoften | 73.5% | 73.8% |       |       | 72.6% | 100.0% |       |       | 73.4% | 73.8%  |       |       |
| Q24 | Relativelyrare  | 27.6% | 28.6% | 0.015 | 0.902 | 27.4% | 40.0%  | 0.380 | 0.537 | 25.3% | 31.1%  | 0.583 | 0.445 |
|     | Relativelyoften | 72.4% | 71.4% |       |       | 72.6% | 60.0%  |       |       | 74.7% | 68.9%  |       |       |

**Table S6.** The parental practices in association with the parent’s age, education and employment status. Group: Children with gastrointestinal diseases.

|     |                 | Parent's age group |               |            |          | Parent's education |               |            |          | Working Parent |               |               |              |
|-----|-----------------|--------------------|---------------|------------|----------|--------------------|---------------|------------|----------|----------------|---------------|---------------|--------------|
|     |                 | <40 years          | ≥40 years     | Chi square | <i>p</i> | ≤12 years          | >12 years     | Chi square | <i>p</i> | No             | Yes           | Chi square    | <i>p</i>     |
|     |                 | <i>N</i> = 109     | <i>N</i> = 32 |            |          | <i>N</i> = 49      | <i>N</i> = 92 |            |          | <i>N</i> = 84  | <i>N</i> = 57 |               |              |
| Q1  | Relativelyrare  | 22.0%              | 12.5%         | 1.408      | 0.235    | 16.3%              | 21.7%         | 0.589      | 0.443    | 14.0%          | 23.8%         | 2.039         | 0.153        |
|     | Relativelyoften | 78.0%              | 87.5%         |            |          | 83.7%              | 78.3%         |            |          | 86.0%          | 76.2%         |               |              |
| Q2  | Relativelyrare  | 32.1%              | 18.8%         | 2.141      | 0.143    | 22.4%              | 32.6%         | 1.600      | 0.206    | <b>14.0%</b>   | <b>39.3%</b>  | <b>10.499</b> | <b>0.001</b> |
|     | Relativelyoften | 67.9%              | 81.3%         |            |          | 77.6%              | 67.4%         |            |          | <b>86.0%</b>   | <b>60.7%</b>  |               |              |
| Q3  | Relativelyrare  | 21.1%              | 9.4%          | 2.262      | 0.133    | 20.4%              | 17.4%         | 0.193      | 0.660    | 15.8%          | 20.2%         | 0.447         | 0.504        |
|     | Relativelyoften | 78.9%              | 90.6%         |            |          | 79.6%              | 82.6%         |            |          | 84.2%          | 79.8%         |               |              |
| Q4  | Relativelyrare  | 59.6%              | 43.8%         | 2.533      | 0.111    | 55.1%              | 56.5%         | 0.026      | 0.872    | 59.6%          | 53.6%         | 0.509         | 0.476        |
|     | Relativelyoften | 40.4%              | 56.3%         |            |          | 44.9%              | 43.5%         |            |          | 40.4%          | 46.4%         |               |              |
| Q5  | Relativelyrare  | 26.6%              | 12.5%         | 2.746      | 0.098    | 24.5%              | 22.8%         | 0.049      | 0.824    | 19.3%          | 26.2%         | 0.900         | 0.343        |
|     | Relativelyoften | 73.4%              | 87.5%         |            |          | 75.5%              | 77.2%         |            |          | 80.7%          | 73.8%         |               |              |
| Q6  | Relativelyrare  | 19.3%              | 15.6%         | 0.218      | 0.641    | 24.5%              | 15.2%         | 1.828      | 0.176    | 19.3%          | 17.9%         | 0.047         | 0.829        |
|     | Relativelyoften | 80.7%              | 84.4%         |            |          | 75.5%              | 84.8%         |            |          | 80.7%          | 82.1%         |               |              |
| Q7  | Relativelyrare  | 6.4%               | 3.1%          | 0.502      | 0.478    | 6.1%               | 5.4%          | 0.028      | 0.867    | 6.0%           | 5.3%          | 0.030         | 0.862        |
|     | Relativelyoften | 93.6%              | 96.9%         |            |          | 93.9%              | 94.6%         |            |          | 94.0%          | 94.7%         |               |              |
| Q8  | Relativelyrare  | 13.8%              | 6.3%          | 1.316      | 0.251    | 16.3%              | 9.8%          | 1.291      | 0.256    | 12.3%          | 11.9%         | 0.005         | 0.946        |
|     | Relativelyoften | 86.2%              | 93.8%         |            |          | 83.7%              | 90.2%         |            |          | 87.7%          | 88.1%         |               |              |
| Q9  | Relativelyrare  | 42.2%              | 25.0%         | 3.098      | 0.078    | 36.7%              | 39.1%         | 0.078      | 0.781    | 45.6%          | 33.3%         | 2.167         | 0.141        |
|     | Relativelyoften | 57.8%              | 75.0%         |            |          | 63.3%              | 60.9%         |            |          | 54.4%          | 66.7%         |               |              |
| Q10 | Relativelyrare  | 23.9%              | 15.6%         | 0.976      | 0.323    | 22.4%              | 21.7%         | 0.009      | 0.923    | 26.3%          | 19.0%         | 1.046         | 0.306        |
|     | Relativelyoften | 76.1%              | 84.4%         |            |          | 77.6%              | 78.3%         |            |          | 73.7%          | 81.0%         |               |              |
| Q11 | Relativelyrare  | 59.6%              | 53.1%         | 0.431      | 0.512    | 57.1%              | 58.7%         | 0.032      | .859     | 57.9%          | 58.3%         | 0.003         | 0.959        |
|     | Relativelyoften | 40.4%              | 46.9%         |            |          | 42.9%              | 41.3%         |            |          | 42.1%          | 41.7%         |               |              |
| Q12 | Relativelyrare  | 70.6%              | 87.5%         | 3.697      | 0.054    | 77.6%              | 72.8%         | 0.375      | .540     | 70.2%          | 77.4%         | 0.927         | 0.336        |
|     | Relativelyoften | 29.4%              | 12.5%         |            |          | 22.4%              | 27.2%         |            |          | 29.8%          | 22.6%         |               |              |
| Q13 | Relativelyrare  | 40.4%              | 28.1%         | 1.580      | 0.209    | 44.9%              | 33.7%         | 1.710      | .191     | 43.9%          | 33.3%         | 1.604         | 0.205        |
|     | Relativelyoften | 59.6%              | 71.9%         |            |          | 55.1%              | 66.3%         |            |          | 56.1%          | 66.7%         |               |              |
| Q14 | Relativelyrare  | 71.6%              | 87.5%         | 3.368      | 0.066    | 73.5%              | 76.1%         | 0.117      | .732     | 80.7%          | 71.4%         | 1.565         | 0.211        |
|     | Relativelyoften | 28.4%              | 12.5%         |            |          | 26.5%              | 23.9%         |            |          | 19.3%          | 28.6%         |               |              |
| Q15 | Relativelyrare  | 57.8%              | 50.0%         | 0.611      | 0.435    | 55.1%              | 56.5%         | 0.026      | .872     | 63.2%          | 51.2%         | 1.974         | 0.160        |

|     |                 |       |        |       |       |       |       |       |       |       |       |       |       |
|-----|-----------------|-------|--------|-------|-------|-------|-------|-------|-------|-------|-------|-------|-------|
|     | Relativelyoften | 42.2% | 50.0%  |       |       | 44.9% | 43.5% |       |       | 36.8% | 48.8% |       |       |
| Q16 | Relativelyrare  | 22.0% | 31.3%  | 1.152 | 0.283 | 22.4% | 25.0% | 0.114 | .736  | 28.1% | 21.4% | 0.819 | 0.366 |
|     | Relativelyoften | 78.0% | 68.8%  |       |       | 77.6% | 75.0% |       |       | 71.9% | 78.6% |       |       |
| Q17 | Relativelyrare  | 2.8%  | 0.0%   | 0.900 | 0.343 | 2.0%  | 2.2%  | 0.003 | .958  | 1.8%  | 2.4%  | 0.064 | 0.800 |
|     | Relativelyoften | 97.2% | 100.0% |       |       | 98.0% | 97.8% |       |       | 98.2% | 97.6% |       |       |
| Q18 | Relativelyrare  | 33.3% | 18.8%  | 2.500 | 0.114 | 30.6% | 29.7% | 0.013 | .908  | 21.1% | 36.1% | 3.665 | 0.056 |
|     | Relativelyoften | 66.7% | 81.3%  |       |       | 69.4% | 70.3% |       |       | 78.9% | 63.9% |       |       |
| Q19 | Relativelyrare  | 42.1% | 32.3%  | 0.963 | 0.327 | 36.2% | 41.8% | 0.404 | .525  | 35.7% | 42.7% | 0.674 | 0.412 |
|     | Relativelyoften | 57.9% | 67.7%  |       |       | 63.8% | 58.2% |       |       | 64.3% | 57.3% |       |       |
| Q20 | Relativelyrare  | 15.9% | 25.8%  | 1.594 | 0.207 | 20.8% | 16.7% | 0.366 | .545  | 17.9% | 18.3% | 0.004 | 0.948 |
|     | Relativelyoften | 84.1% | 74.2%  |       |       | 79.2% | 83.3% |       |       | 82.1% | 81.7% |       |       |
| Q21 | Relativelyrare  | 30.6% | 25.0%  | 0.368 | 0.544 | 26.5% | 30.8% | 0.276 | 0.599 | 26.3% | 31.3% | 0.409 | 0.522 |
|     | Relativelyoften | 69.4% | 75.0%  |       |       | 73.5% | 69.2% |       |       | 73.7% | 68.7% |       |       |
| Q22 | Relativelyrare  | 73.1% | 84.4%  | 1.692 | 0.193 | 75.5% | 75.8% | 0.002 | 0.967 | 80.7% | 72.3% | 1.301 | 0.254 |
|     | Relativelyoften | 26.9% | 15.6%  |       |       | 24.5% | 24.2% |       |       | 19.3% | 27.7% |       |       |
| Q23 | Relativelyrare  | 26.9% | 25.0%  | 0.044 | 0.835 | 26.5% | 26.4% | 0.001 | 0.984 | 21.1% | 30.1% | 1.429 | 0.232 |
|     | Relativelyoften | 73.1% | 75.0%  |       |       | 73.5% | 73.6% |       |       | 78.9% | 69.9% |       |       |
| Q24 | Relativelyrare  | 26.9% | 31.3%  | 0.238 | 0.626 | 22.4% | 30.8% | 1.097 | 0.295 | 29.8% | 26.5% | 0.185 | 0.667 |
|     | Relativelyoften | 73.1% | 68.8%  |       |       | 77.6% | 69.2% |       |       | 70.2% | 73.5% |       |       |

Table S7. Associations between items 1–24 and demographics as well with group. Two-layer chi-square.

| Item | Child's sex              | Only child               | Firstborn                | Child's age group<br>(≤5 years vs > 5 years) | Parent's sex  | Sex concordance          | Parent's age group<br>(<40 years vs ≥40 years) | Parent's education<br>(≤12 years vs > 12 years) | Working parent       |
|------|--------------------------|--------------------------|--------------------------|----------------------------------------------|---------------|--------------------------|------------------------------------------------|-------------------------------------------------|----------------------|
| Q1   | 0.171 (.679)             | 2.680 (.102)             | <b>4.224 (.040)</b>      | 0.269 (0.604)                                | 1.834 (0.176) | 1.076 (0.300)            | 0.380 (0.538)                                  | <b>5.914 (0.015)</b>                            | 0.768 (0.381)        |
| Q2   | 0.080 (.777)             | 0.027 (.870)             | 0.774 (.379)             | 1.401 (0.237)                                | 1.085 (0.298) | 0.652(0.419)             | 0.052 (0.819)                                  | <b>10.233 (0.001)</b>                           | <b>6.322 (0.012)</b> |
| Q3   | 0.029 (.866)             | 0.269 (.604)             | 0.319 (.572)             | 0.056 (0.812)                                | 0.019 (0.890) | 0.376 (0.540)            | 1.516 (0.218)                                  | 0.050 (0.823)                                   | 3.304 (0.069)        |
| Q4   | <b>12.667 (&lt;.001)</b> | 0.097 (.755)             | 0.540 (.463)             | 1.407 (0.236)                                | 3.328 (0.068) | <b>12.638(&lt;0.001)</b> | 1.600 (0.206)                                  | 2.645 (0.104)                                   | <b>9.166 (0.002)</b> |
| Q5   | 3.172 (.075)             | <b>8.593 (.003)</b>      | <b>3.999 (.046)</b>      | 0.772 (0.380)                                | 0.003 (0.957) | 1.768 (0.184)            | 1.024 (0.312)                                  | <b>7.541 (0.006)</b>                            | 3.767 (0.052)        |
| Q6   | 0.391 (.532)             | 4.620 (.032)             | 1.004 (.316)             | 3.228 (0.072)                                | 0.341 (0.559) | 0.785 (0.376)            | 0.008 (0.928)                                  | 1.153 (0.283)                                   | 0.525 (0.469)        |
| Q7   | 0.728 (.394)             | 0.101 (.751)             | 1.258 (.262)             | 0.539(0.463)                                 | 0.370 (0.543) | 2.058(0.151)             | 0.026 (0.872)                                  | <b>4.731 (0.030)</b>                            | 0.077 (0.782)        |
| Q8   | 2.855 (.091)             | 0.754 (.385)             | 2.273 (.132)             | 0.059 (.807)                                 | 0.861 (0.353) | 1.573 (0.210)            | 3.329(0.068)                                   | <b>15.181 (&lt;0.001)</b>                       | 2.972 (0.085)        |
| Q9   | <b>6.467(.011)</b>       | <b>13.445 (&lt;.001)</b> | <b>5.039 (.025)</b>      | <b>50.405 (&lt;.001)</b>                     | 0.006 (0.939) | 3.070 (0.080)            | 1.412 (0.235)                                  | 2.081 (0.149)                                   | 3.464 (0.063)        |
| Q10  | <b>5.230 (.022)</b>      | <b>12.075 (.001)</b>     | <b>9.731 (.002)</b>      | <b>9.065 (.003)</b>                          | 0.279 (0.579) | 3.652 (0.056)            | 0.048 (0.827)                                  | 2.040 (0.153)                                   | 2.686 (0.101)        |
| Q11  | 3.343 (.067)             | 0.792 (.373)             | <b>7.620 (.006)</b>      | 0.869(.351)                                  | 0.109 (0.741) | <b>5.475 (0.019)</b>     | 1.881 (0.170)                                  | 1.045 (0.307)                                   | 0.812 (0.367)        |
| Q12  | <b>3.922 (.048)</b>      | 3.109 (.078)             | <b>12.871 (&lt;.001)</b> | 3.014 (.083)                                 | 0.102 (0.750) | 3.453 (0.063)            | 3.382 (0.066)                                  | 0.969 (0.325)                                   | 4.871 (0.027)        |
| Q13  | 1.812 (.178)             | 1.037 (.308)             | 0.840 (.359)             | 5.875 (.015)                                 | 0.130 (0.719) | 1.070 (0.301)            | 0.328 (0.567)                                  | 3.241 (0.072)                                   | 1.330 (0.249)        |
| Q14  | 0.581 (.446)             | 0.001 (.990)             | 1.162(.281)              | 0.022 (.881)                                 | 0.433 (0.511) | 0.004(0.949)             | 0.144 (0.705)                                  | 0.162 (0.688)                                   | 0.827 (0.363)        |

|     |                     |                          |                     |              |                      |                      |               |                      |                      |
|-----|---------------------|--------------------------|---------------------|--------------|----------------------|----------------------|---------------|----------------------|----------------------|
| Q15 | 0.179 (.672)        | 0.134 (.714)             | 1.220 (.269)        | 2.341 (.126) | 0.069 (0.793)        | 0.190 (.663)         | 0.976 (.323)  | 0.116 (0.733)        | 0.163 (0.687)        |
| Q16 | 0.011 (.917)        | <b>12.422 (&lt;.001)</b> | <b>6.198 (.013)</b> | 0.202 (.653) | 2.621 (0.105)        | 0.041 (0.839)        | 0.020 (0.888) | 0.060 (0.807)        | 0.039 (0.844)        |
| Q17 | 2.530 (.112)        | 0.196 (.658)             | 0.001 (.994)        | 0.189 (.664) | 1.338 (0.247)        | <b>4.102 (0.043)</b> | 2.233 (0.135) | 0.326 (0.568)        | <b>4.260 (0.039)</b> |
| Q18 | 0.417 (.519)        | 0.281 (.596)             | 2.614 (.106)        | 1.581 (.209) | <b>4.082 (0.043)</b> | 0.325 (0.569)        | 1.002 (0.317) | 0.403 (0.526)        | <b>5.365 (0.021)</b> |
| Q19 | 0.031 (.860)        | 0.445 (.505)             | 0.201 (.654)        | 1.098 (.295) | 0.707 (0.401)        | 0.384 (0.535)        | 1.158 (0.282) | 2.257 (0.133)        | 0.345 (0.557)        |
| Q20 | 0.263 (.608)        | 0.020 (.889)             | 0.243 (.622)        | 0.548 (.459) | 0.697(0.404)         | 0.043 (0.836)        | 2.178 (0.140) | 1.658 (0.198)        | 0.004 (0.947)        |
| Q21 | 0.053 (.817)        | 0.120 (.729)             | 1.272 (.259)        | 2.394 (.122) | 0.910 (0.340)        | 0.001 (0.997)        | 0.372 (0.542) | 0.095 (0.758)        | 1.055 (0.304)        |
| Q22 | 2.080 (.149)        | <b>6.328 (.012)</b>      | 2.024 (.155)        | 3.164 (.075) | 0.009 (0.923)        | 0.333 (0.564)        | 0.436 (0.509) | 1.434 (0.231)        | 2.915 (0.088)        |
| Q23 | <b>4.412 (.036)</b> | 1.057 (.304)             | 0.078 (.779)        | 0.141 (.707) | 1.181 (0.277)        | <b>5.245 (0.022)</b> | 0.241 (0.623) | 0.119 (0.730)        | <b>5.483 (0.019)</b> |
| Q24 | 1.486 (.223)        | <b>6.249 (.012)</b>      | <b>3.940 (.047)</b> | 0.157 (.692) | 3.349 (0.067)        | 0.154 (0.695)        | 0.022 (0.883) | <b>5.545 (0.019)</b> | 0.733 (0.392)        |

For this analysis the 2-point coding of questions 1-24 was used (as in the supplementary tables S1-S6). Chi-square values are presented followed by *p*-values in parenthesis; *p*-values lower than 0.05 are shown in bold.
